CORRECTION

# Correction: Correction: AKT Inhibitors Promote Cell Death in Cervical Cancer through Disruption of mTOR Signaling and Glucose Uptake

The *PLOS ONE* Staff

The sixth author's name is spelled incorrectly. The correct name is: Janet S. Rader.

## References

1. Rashmi R, DeSelm C, Helms C, Bowcock A, Rogers BE, Rader J, et al. (2014) AKT Inhibitors Promote Cell Death in Cervical Cancer through Disruption of mTOR Signaling and Glucose Uptake. PLoS ONE 9(4): e92948. doi:[10.1371/journal.pone.0092948](https://doi.org/10.1371/journal.pone.0092948) PMID: [24705275](https://pubmed.ncbi.nlm.nih.gov/24705275/)
2. The *PLOS ONE* Staff (2014) Correction: AKT Inhibitors Promote Cell Death in Cervical Cancer through Disruption of mTOR Signaling and Glucose Uptake. PLoS ONE 9(9): e107846. doi:[10.1371/journal.pone.0107846](https://doi.org/10.1371/journal.pone.0107846)

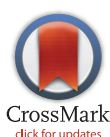

## OPEN ACCESS

**Citation:** The *PLOS ONE* Staff (2016) Correction: Correction: AKT Inhibitors Promote Cell Death in Cervical Cancer through Disruption of mTOR Signaling and Glucose Uptake. PLoS ONE 11(5): e0155168. doi:[10.1371/journal.pone.0155168](https://doi.org/10.1371/journal.pone.0155168)

**Published:** May 5, 2016

**Copyright:** © 2016 The PLOS ONE Staff. This is an open access article distributed under the terms of the [Creative Commons Attribution License](https://creativecommons.org/licenses/by/4.0/), which permits unrestricted use, distribution, and reproduction in any medium, provided the original author and source are credited.
